# Supplementary material for: The Arthrobacter arilaitensis Re117 Genome Sequence Reveals Its Genetic Adaptation to the Surface of Cheese
Source: PubMed Central journal article supplement (PMC2991359; doi:10.1371/journal.pone.0015489), 2010-11-24

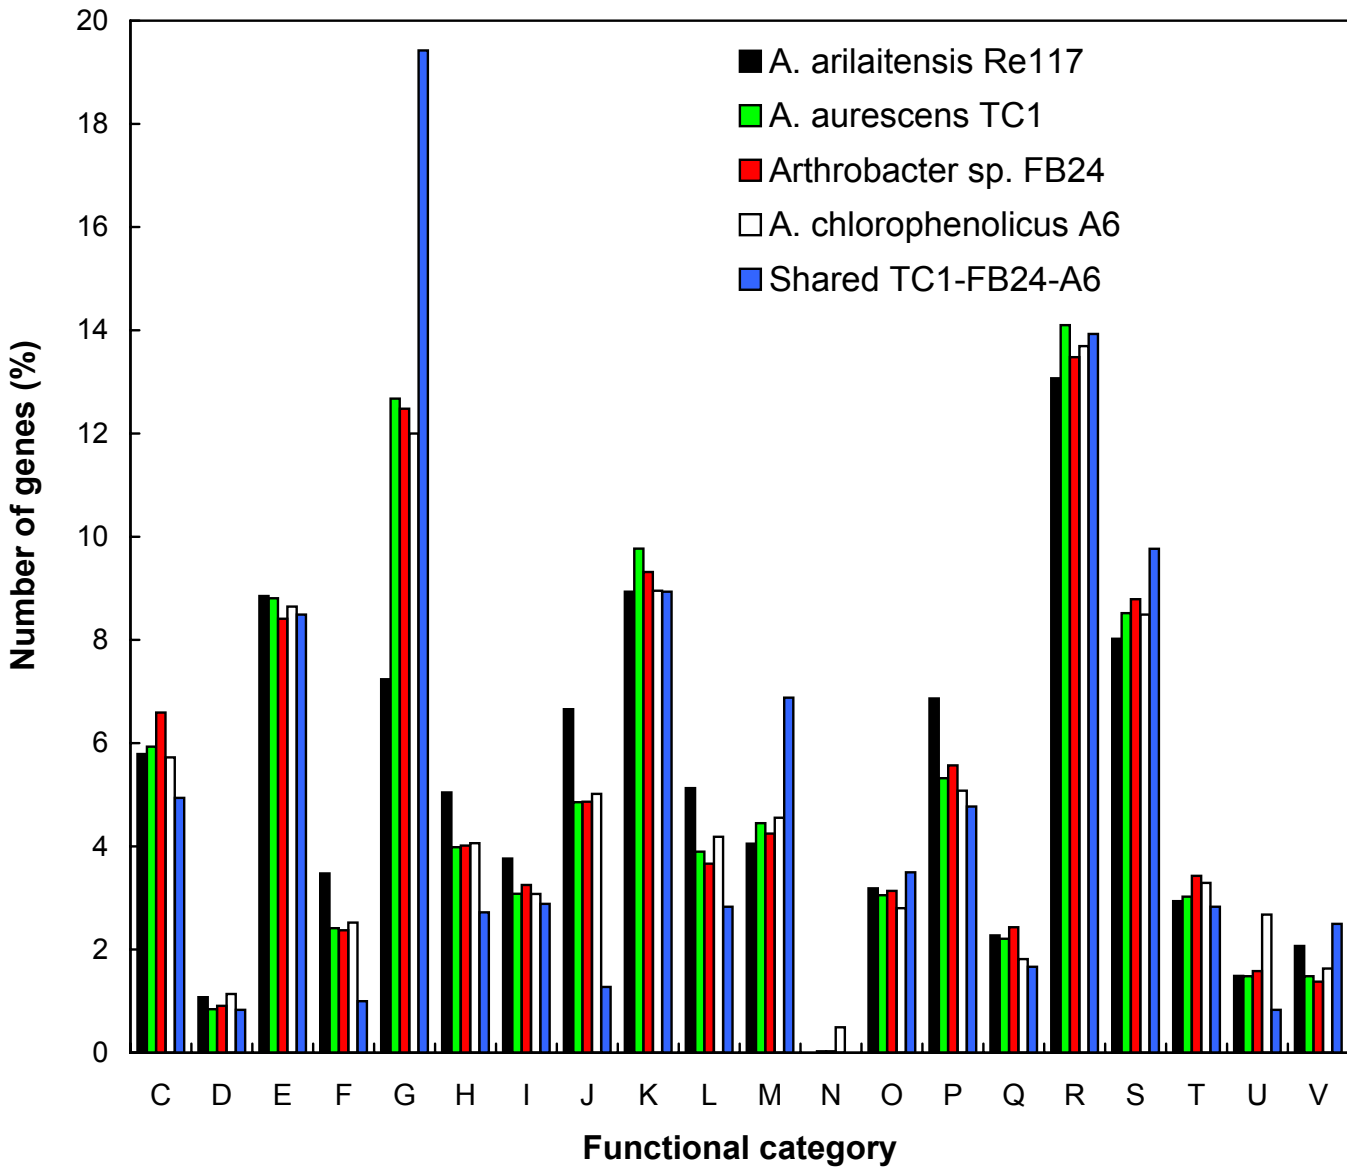

Supplement: pone.0015489.s003.pdf [file pone.0015489.s003.pdf]
